# Supplementary material
Source: Springer Nature journal article supplement (https://www.springermedizin.de/resource/supplementary/12979_2014_178_MOESM1_ESM.pdf/9603140)

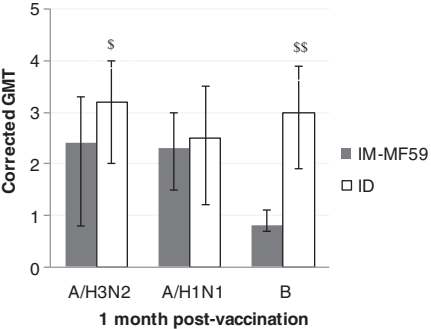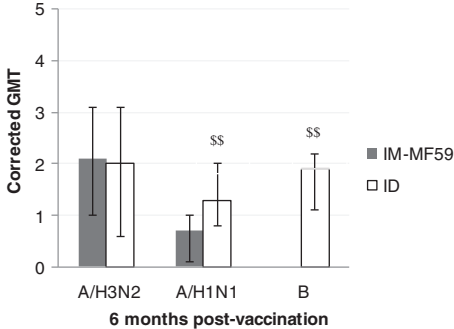

Supplement: MOESM1 [file 9603140]
